# Supplementary material
Source: HighWire-hosted journal article supplement (https://gh.bmj.com/content/2/2/e000269)

## APPENDICES

### Appendix 1. Bottom-up approach in Brazil.

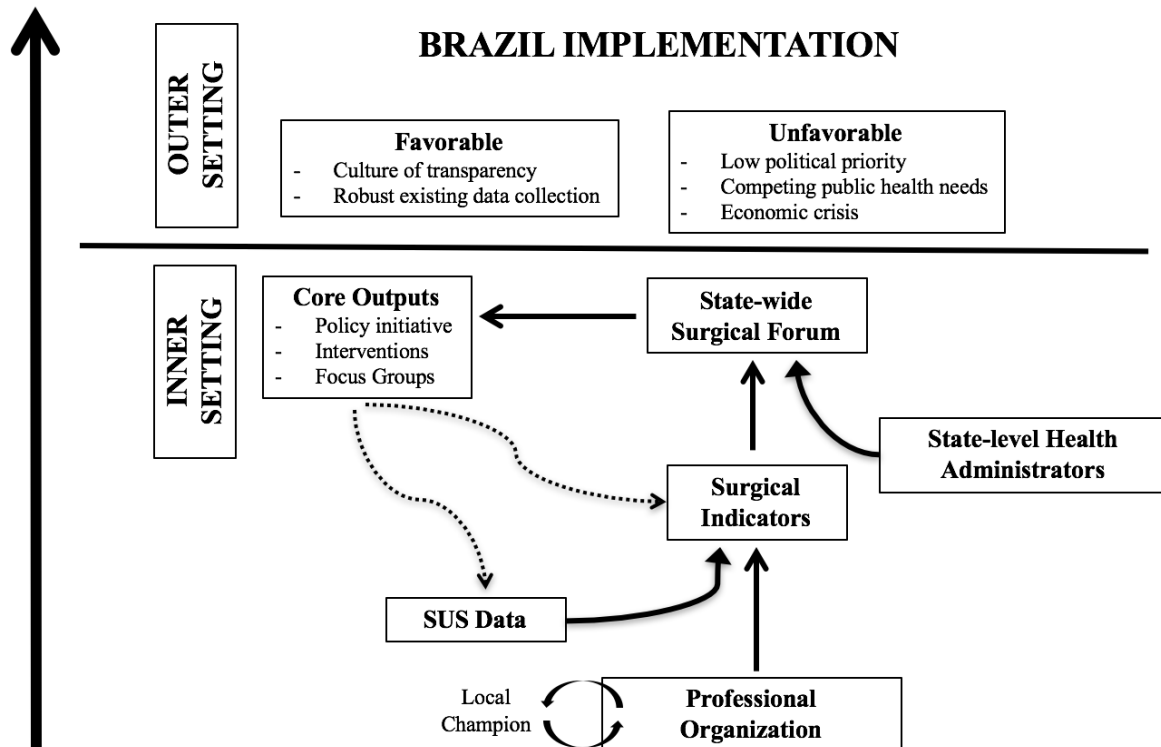

## Appendix 2. Top-down approach in Zambia.

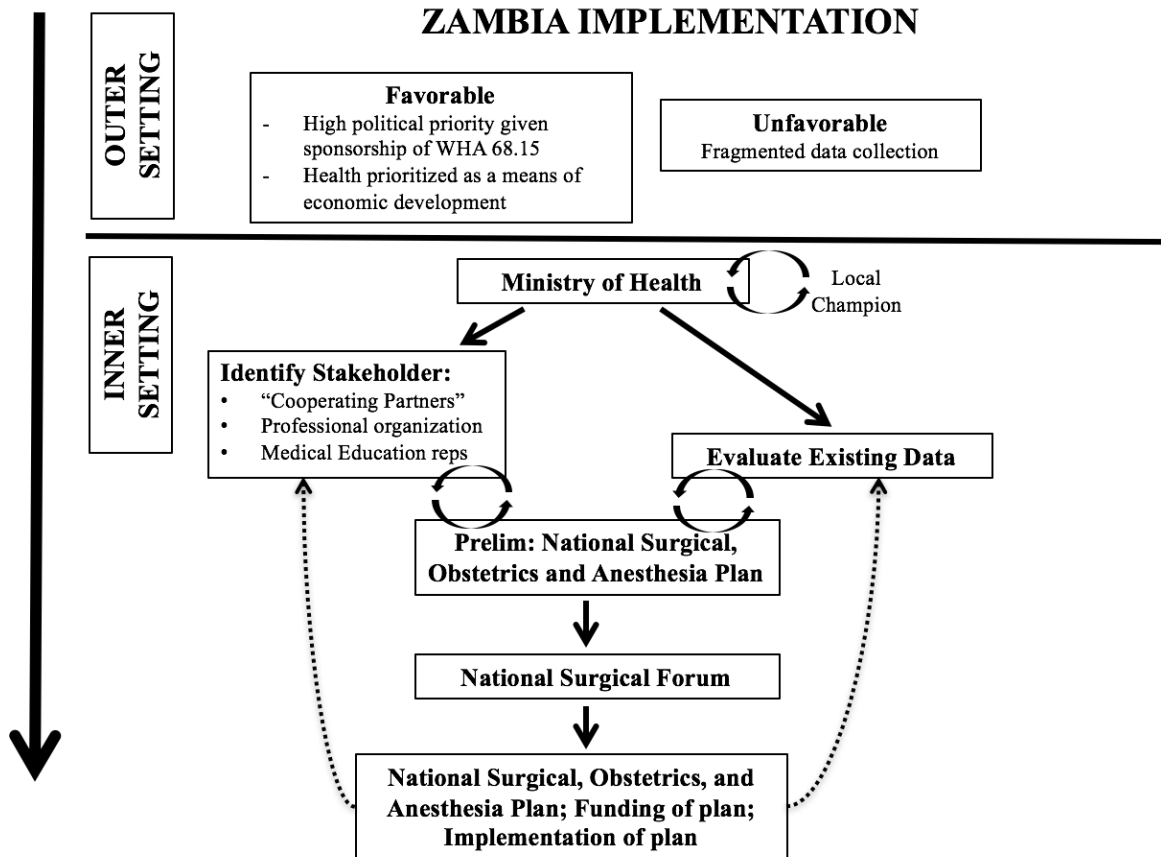

Supplement: inline-supplementary-material-1 [file inline-supplementary-material-1.pdf]
